# Supplementary material
Source: PubMed Central journal article supplement (PMC5080636)

David C. Volz, Jessica K. Leet, Albert Chen, Heather M. Stapleton, Neerja Katiyar, Rakesh Kaundal, Yang Yu, and Yinsheng Wang

Tris(1,3-dichloro-2-propyl) phosphate Induces Genome-Wide Hypomethylation Within Early Zebrafish Embryos

38 Pages  
28 Figures

## Supporting Information Figure Legends

**Figure S1.** Representative selected-ion chromatograms (SICs) for monitoring the  $m/z$  242→126 (A) and  $m/z$  247→126 (B) transitions for the  $[M+H]^+$  ions of the unlabeled 5-mdC and  $[^{13}C_5]$ -5-mdC, respectively, in the nucleoside mixture of genomic DNA extracted from zebrafish embryos. Shown in the insets are the  $MS^2$  spectra for the unlabeled and labeled 5-mdC.

**Figure S2.** Representative selected-ion chromatograms (SICs) for monitoring the  $m/z$  268→152→135 (A) and  $m/z$  273→157→139 (B) transitions for the  $[M+H]^+$  ions of the unlabeled dG and  $[^{15}N_5]$ -dG, respectively, in the nucleoside mixture of genomic DNA extracted from zebrafish embryos. Shown in the insets are the  $MS^3$  spectra for the unlabeled and labeled dG.

**Figure S3.** Calibration curves for the quantification of 5-mdC (A) and dG (B).

**Figure S4.** Position-specific signal-to-noise ratios for cytosine methylation within a CpG context on **chromosome 1 (chr1)**. Following initiation of 250  $\mu$ M 5-azaC or 2  $\mu$ M TDCIPP exposure at 0.75 hpf, genomic DNA was extracted from 2-hpf embryos and, following bisulfite conversion, whole-genome bisulfite sequencing (WGBS) was conducted on Illumina's HiSeq 2500 platform. All SNRs are relative to vehicle controls and reflect variation among two replicates per control group and three replicates per treatment group. SNRs>0 and SNRs<0 represent hypermethylation and hypomethylation, respectively, relative to vehicle controls.

**Figure S5.** Position-specific signal-to-noise ratios for cytosine methylation within a CpG context on **chromosome 2 (chr2)**. Following initiation of 250  $\mu$ M 5-azaC or 2  $\mu$ M TDCIPP exposure at

0.75 hpf, genomic DNA was extracted from 2-hpf embryos and, following bisulfite conversion, whole-genome bisulfite sequencing (WGBS) was conducted on Illumina's HiSeq 2500 platform. All SNRs are relative to vehicle controls and reflect variation among two replicates per control group and three replicates per treatment group. SNRs $>0$  and SNRs $<0$  represent hypermethylation and hypomethylation, respectively, relative to vehicle controls.

**Figure S6.** Position-specific signal-to-noise ratios for cytosine methylation within a CpG context on **chromosome 3 (chr3)**. Following initiation of 250  $\mu$ M 5-azaC or 2  $\mu$ M TDCIPP exposure at 0.75 hpf, genomic DNA was extracted from 2-hpf embryos and, following bisulfite conversion, whole-genome bisulfite sequencing (WGBS) was conducted on Illumina's HiSeq 2500 platform. All SNRs are relative to vehicle controls and reflect variation among two replicates per control group and three replicates per treatment group. SNRs $>0$  and SNRs $<0$  represent hypermethylation and hypomethylation, respectively, relative to vehicle controls.

**Figure S7.** Position-specific signal-to-noise ratios for cytosine methylation within a CpG context on **chromosome 4 (chr4)**. Following initiation of 250  $\mu$ M 5-azaC or 2  $\mu$ M TDCIPP exposure at 0.75 hpf, genomic DNA was extracted from 2-hpf embryos and, following bisulfite conversion, whole-genome bisulfite sequencing (WGBS) was conducted on Illumina's HiSeq 2500 platform. All SNRs are relative to vehicle controls and reflect variation among two replicates per control group and three replicates per treatment group. SNRs $>0$  and SNRs $<0$  represent hypermethylation and hypomethylation, respectively, relative to vehicle controls.

**Figure S8.** Position-specific signal-to-noise ratios for cytosine methylation within a CpG context on **chromosome 5 (chr5)**. Following initiation of 250  $\mu\text{M}$  5-azaC or 2  $\mu\text{M}$  TDCIPP exposure at 0.75 hpf, genomic DNA was extracted from 2-hpf embryos and, following bisulfite conversion, whole-genome bisulfite sequencing (WGBS) was conducted on Illumina's HiSeq 2500 platform. All SNRs are relative to vehicle controls and reflect variation among two replicates per control group and three replicates per treatment group. SNRs $>0$  and SNRs $<0$  represent hypermethylation and hypomethylation, respectively, relative to vehicle controls.

**Figure S9.** Position-specific signal-to-noise ratios for cytosine methylation within a CpG context on **chromosome 6 (chr6)**. Following initiation of 250  $\mu\text{M}$  5-azaC or 2  $\mu\text{M}$  TDCIPP exposure at 0.75 hpf, genomic DNA was extracted from 2-hpf embryos and, following bisulfite conversion, whole-genome bisulfite sequencing (WGBS) was conducted on Illumina's HiSeq 2500 platform. All SNRs are relative to vehicle controls and reflect variation among two replicates per control group and three replicates per treatment group. SNRs $>0$  and SNRs $<0$  represent hypermethylation and hypomethylation, respectively, relative to vehicle controls.

**Figure S10.** Position-specific signal-to-noise ratios for cytosine methylation within a CpG context on **chromosome 7 (chr7)**. Following initiation of 250  $\mu\text{M}$  5-azaC or 2  $\mu\text{M}$  TDCIPP exposure at 0.75 hpf, genomic DNA was extracted from 2-hpf embryos and, following bisulfite conversion, whole-genome bisulfite sequencing (WGBS) was conducted on Illumina's HiSeq 2500 platform. All SNRs are relative to vehicle controls and reflect variation among two replicates per control group and three replicates per treatment group. SNRs $>0$  and SNRs $<0$  represent hypermethylation and hypomethylation, respectively, relative to vehicle controls.

**Figure S11.** Position-specific signal-to-noise ratios for cytosine methylation within a CpG context on **chromosome 8 (chr8)**. Following initiation of 250  $\mu\text{M}$  5-azaC or 2  $\mu\text{M}$  TDCIPP exposure at 0.75 hpf, genomic DNA was extracted from 2-hpf embryos and, following bisulfite conversion, whole-genome bisulfite sequencing (WGBS) was conducted on Illumina's HiSeq 2500 platform. All SNRs are relative to vehicle controls and reflect variation among two replicates per control group and three replicates per treatment group. SNRs $>0$  and SNRs $<0$  represent hypermethylation and hypomethylation, respectively, relative to vehicle controls.

**Figure S12.** Position-specific signal-to-noise ratios for cytosine methylation within a CpG context on **chromosome 9 (chr9)**. Following initiation of 250  $\mu\text{M}$  5-azaC or 2  $\mu\text{M}$  TDCIPP exposure at 0.75 hpf, genomic DNA was extracted from 2-hpf embryos and, following bisulfite conversion, whole-genome bisulfite sequencing (WGBS) was conducted on Illumina's HiSeq 2500 platform. All SNRs are relative to vehicle controls and reflect variation among two replicates per control group and three replicates per treatment group. SNRs $>0$  and SNRs $<0$  represent hypermethylation and hypomethylation, respectively, relative to vehicle controls.

**Figure S13.** Position-specific signal-to-noise ratios for cytosine methylation within a CpG context on **chromosome 10 (chr10)**. Following initiation of 250  $\mu\text{M}$  5-azaC or 2  $\mu\text{M}$  TDCIPP exposure at 0.75 hpf, genomic DNA was extracted from 2-hpf embryos and, following bisulfite conversion, whole-genome bisulfite sequencing (WGBS) was conducted on Illumina's HiSeq 2500 platform. All SNRs are relative to vehicle controls and reflect variation among two replicates per control

group and three replicates per treatment group. SNRs $>0$  and SNRs $<0$  represent hypermethylation and hypomethylation, respectively, relative to vehicle controls.

**Figure S14.** Position-specific signal-to-noise ratios for cytosine methylation within a CpG context on **chromosome 11 (chr11)**. Following initiation of 250  $\mu$ M 5-azaC or 2  $\mu$ M TDCIPP exposure at 0.75 hpf, genomic DNA was extracted from 2-hpf embryos and, following bisulfite conversion, whole-genome bisulfite sequencing (WGBS) was conducted on Illumina's HiSeq 2500 platform. All SNRs are relative to vehicle controls and reflect variation among two replicates per control group and three replicates per treatment group. SNRs $>0$  and SNRs $<0$  represent hypermethylation and hypomethylation, respectively, relative to vehicle controls.

**Figure S15.** Position-specific signal-to-noise ratios for cytosine methylation within a CpG context on **chromosome 12 (chr12)**. Following initiation of 250  $\mu$ M 5-azaC or 2  $\mu$ M TDCIPP exposure at 0.75 hpf, genomic DNA was extracted from 2-hpf embryos and, following bisulfite conversion, whole-genome bisulfite sequencing (WGBS) was conducted on Illumina's HiSeq 2500 platform. All SNRs are relative to vehicle controls and reflect variation among two replicates per control group and three replicates per treatment group. SNRs $>0$  and SNRs $<0$  represent hypermethylation and hypomethylation, respectively, relative to vehicle controls.

**Figure S16.** Position-specific signal-to-noise ratios for cytosine methylation within a CpG context on **chromosome 13 (chr13)**. Following initiation of 250  $\mu$ M 5-azaC or 2  $\mu$ M TDCIPP exposure at 0.75 hpf, genomic DNA was extracted from 2-hpf embryos and, following bisulfite conversion, whole-genome bisulfite sequencing (WGBS) was conducted on Illumina's HiSeq 2500 platform.

All SNRs are relative to vehicle controls and reflect variation among two replicates per control group and three replicates per treatment group. SNRs>0 and SNRs<0 represent hypermethylation and hypomethylation, respectively, relative to vehicle controls.

**Figure S17.** Position-specific signal-to-noise ratios for cytosine methylation within a CpG context on **chromosome 14 (chr14)**. Following initiation of 250  $\mu$ M 5-azaC or 2  $\mu$ M TDCIPP exposure at 0.75 hpf, genomic DNA was extracted from 2-hpf embryos and, following bisulfite conversion, whole-genome bisulfite sequencing (WGBS) was conducted on Illumina's HiSeq 2500 platform. All SNRs are relative to vehicle controls and reflect variation among two replicates per control group and three replicates per treatment group. SNRs>0 and SNRs<0 represent hypermethylation and hypomethylation, respectively, relative to vehicle controls.

**Figure S18.** Position-specific signal-to-noise ratios for cytosine methylation within a CpG context on **chromosome 15 (chr15)**. Following initiation of 250  $\mu$ M 5-azaC or 2  $\mu$ M TDCIPP exposure at 0.75 hpf, genomic DNA was extracted from 2-hpf embryos and, following bisulfite conversion, whole-genome bisulfite sequencing (WGBS) was conducted on Illumina's HiSeq 2500 platform. All SNRs are relative to vehicle controls and reflect variation among two replicates per control group and three replicates per treatment group. SNRs>0 and SNRs<0 represent hypermethylation and hypomethylation, respectively, relative to vehicle controls.

**Figure S19.** Position-specific signal-to-noise ratios for cytosine methylation within a CpG context on **chromosome 16 (chr16)**. Following initiation of 250  $\mu$ M 5-azaC or 2  $\mu$ M TDCIPP exposure at 0.75 hpf, genomic DNA was extracted from 2-hpf embryos and, following bisulfite conversion,

whole-genome bisulfite sequencing (WGBS) was conducted on Illumina's HiSeq 2500 platform. All SNRs are relative to vehicle controls and reflect variation among two replicates per control group and three replicates per treatment group. SNRs $>0$  and SNRs $<0$  represent hypermethylation and hypomethylation, respectively, relative to vehicle controls.

**Figure S20.** Position-specific signal-to-noise ratios for cytosine methylation within a CpG context on **chromosome 17 (chr17)**. Following initiation of 250  $\mu\text{M}$  5-azaC or 2  $\mu\text{M}$  TDCIPP exposure at 0.75 hpf, genomic DNA was extracted from 2-hpf embryos and, following bisulfite conversion, whole-genome bisulfite sequencing (WGBS) was conducted on Illumina's HiSeq 2500 platform. All SNRs are relative to vehicle controls and reflect variation among two replicates per control group and three replicates per treatment group. SNRs $>0$  and SNRs $<0$  represent hypermethylation and hypomethylation, respectively, relative to vehicle controls.

**Figure S21.** Position-specific signal-to-noise ratios for cytosine methylation within a CpG context on **chromosome 18 (chr18)**. Following initiation of 250  $\mu\text{M}$  5-azaC or 2  $\mu\text{M}$  TDCIPP exposure at 0.75 hpf, genomic DNA was extracted from 2-hpf embryos and, following bisulfite conversion, whole-genome bisulfite sequencing (WGBS) was conducted on Illumina's HiSeq 2500 platform. All SNRs are relative to vehicle controls and reflect variation among two replicates per control group and three replicates per treatment group. SNRs $>0$  and SNRs $<0$  represent hypermethylation and hypomethylation, respectively, relative to vehicle controls.

**Figure S22.** Position-specific signal-to-noise ratios for cytosine methylation within a CpG context on **chromosome 19 (chr19)**. Following initiation of 250  $\mu\text{M}$  5-azaC or 2  $\mu\text{M}$  TDCIPP exposure



at 0.75 hpf, genomic DNA was extracted from 2-hpf embryos and, following bisulfite conversion, whole-genome bisulfite sequencing (WGBS) was conducted on Illumina's HiSeq 2500 platform. All SNRs are relative to vehicle controls and reflect variation among two replicates per control group and three replicates per treatment group. SNRs $>0$  and SNRs $<0$  represent hypermethylation and hypomethylation, respectively, relative to vehicle controls.

**Figure S23.** Position-specific signal-to-noise ratios for cytosine methylation within a CpG context on **chromosome 20 (chr20)**. Following initiation of 250  $\mu\text{M}$  5-azaC or 2  $\mu\text{M}$  TDCIPP exposure at 0.75 hpf, genomic DNA was extracted from 2-hpf embryos and, following bisulfite conversion, whole-genome bisulfite sequencing (WGBS) was conducted on Illumina's HiSeq 2500 platform. All SNRs are relative to vehicle controls and reflect variation among two replicates per control group and three replicates per treatment group. SNRs $>0$  and SNRs $<0$  represent hypermethylation and hypomethylation, respectively, relative to vehicle controls.

**Figure S24.** Position-specific signal-to-noise ratios for cytosine methylation within a CpG context on **chromosome 21 (chr21)**. Following initiation of 250  $\mu\text{M}$  5-azaC or 2  $\mu\text{M}$  TDCIPP exposure at 0.75 hpf, genomic DNA was extracted from 2-hpf embryos and, following bisulfite conversion, whole-genome bisulfite sequencing (WGBS) was conducted on Illumina's HiSeq 2500 platform. All SNRs are relative to vehicle controls and reflect variation among two replicates per control group and three replicates per treatment group. SNRs $>0$  and SNRs $<0$  represent hypermethylation and hypomethylation, respectively, relative to vehicle controls.

**Figure S25.** Position-specific signal-to-noise ratios for cytosine methylation within a CpG context on **chromosome 22 (chr22)**. Following initiation of 250  $\mu\text{M}$  5-azaC or 2  $\mu\text{M}$  TDCIPP exposure at 0.75 hpf, genomic DNA was extracted from 2-hpf embryos and, following bisulfite conversion, whole-genome bisulfite sequencing (WGBS) was conducted on Illumina's HiSeq 2500 platform. All SNRs are relative to vehicle controls and reflect variation among two replicates per control group and three replicates per treatment group. SNRs $>0$  and SNRs $<0$  represent hypermethylation and hypomethylation, respectively, relative to vehicle controls.

**Figure S26.** Position-specific signal-to-noise ratios for cytosine methylation within a CpG context on **chromosome 23 (chr23)**. Following initiation of 250  $\mu\text{M}$  5-azaC or 2  $\mu\text{M}$  TDCIPP exposure at 0.75 hpf, genomic DNA was extracted from 2-hpf embryos and, following bisulfite conversion, whole-genome bisulfite sequencing (WGBS) was conducted on Illumina's HiSeq 2500 platform. All SNRs are relative to vehicle controls and reflect variation among two replicates per control group and three replicates per treatment group. SNRs $>0$  and SNRs $<0$  represent hypermethylation and hypomethylation, respectively, relative to vehicle controls.

**Figure S27.** Position-specific signal-to-noise ratios for cytosine methylation within a CpG context on **chromosome 24 (chr24)**. Following initiation of 250  $\mu\text{M}$  5-azaC or 2  $\mu\text{M}$  TDCIPP exposure at 0.75 hpf, genomic DNA was extracted from 2-hpf embryos and, following bisulfite conversion, whole-genome bisulfite sequencing (WGBS) was conducted on Illumina's HiSeq 2500 platform. All SNRs are relative to vehicle controls and reflect variation among two replicates per control group and three replicates per treatment group. SNRs $>0$  and SNRs $<0$  represent hypermethylation and hypomethylation, respectively, relative to vehicle controls.

**Figure S28.** Position-specific signal-to-noise ratios for cytosine methylation within a CpG context on **chromosome 25 (chr25)**. Following initiation of 250  $\mu$ M 5-azaC or 2  $\mu$ M TDCIPP exposure at 0.75 hpf, genomic DNA was extracted from 2-hpf embryos and, following bisulfite conversion, whole-genome bisulfite sequencing (WGBS) was conducted on Illumina's HiSeq 2500 platform. All SNRs are relative to vehicle controls and reflect variation among two replicates per control group and three replicates per treatment group. SNRs $>0$  and SNRs $<0$  represent hypermethylation and hypomethylation, respectively, relative to vehicle controls.

Figure S1.

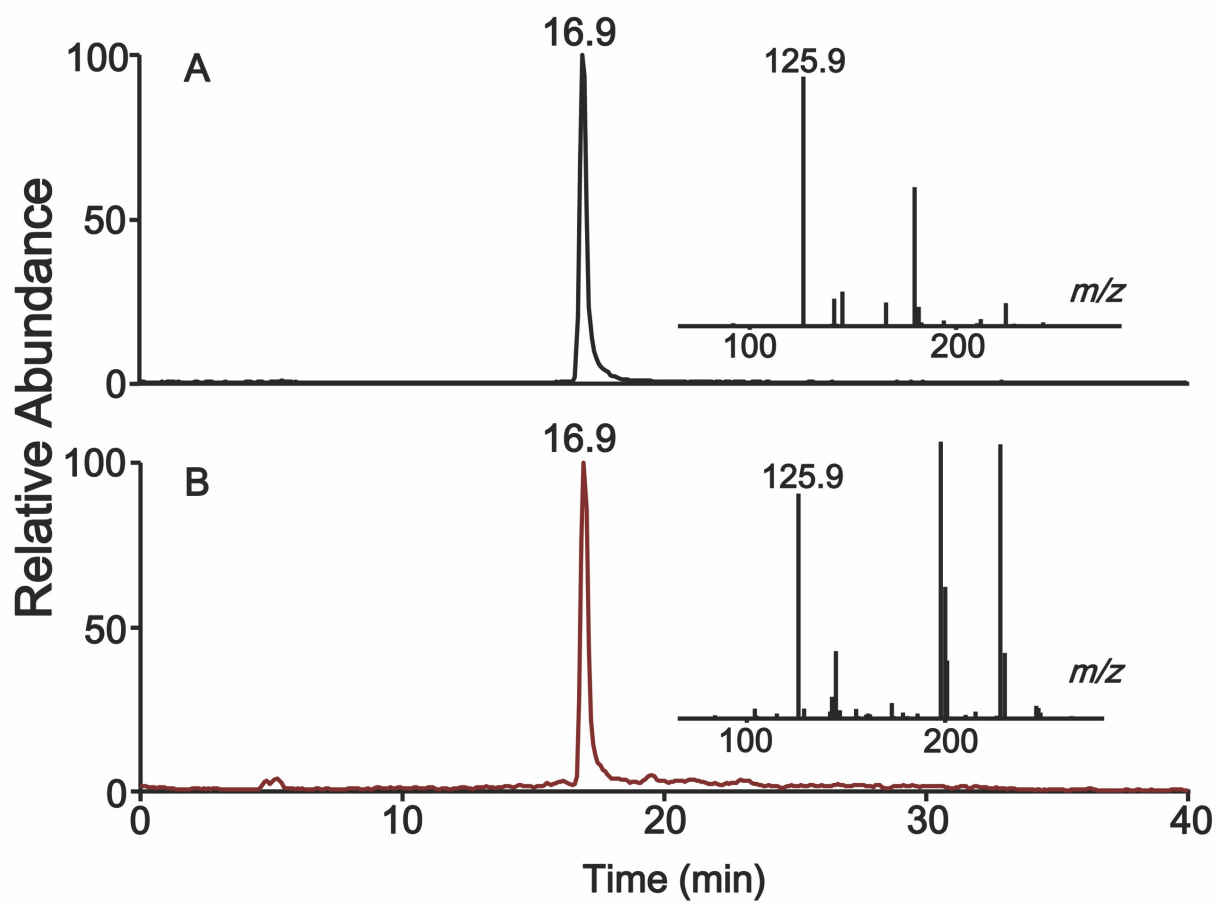

Figure S2.

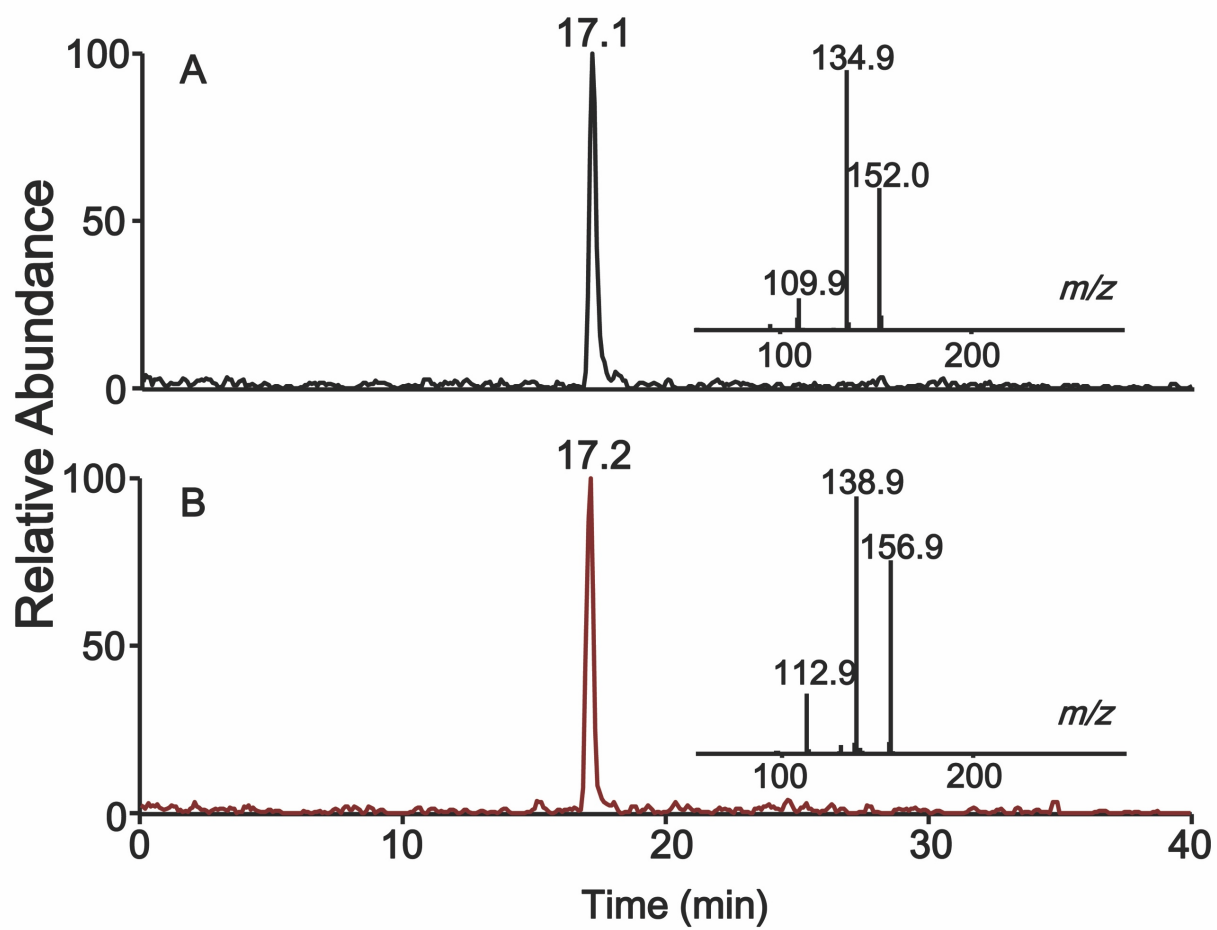

Figure S3.

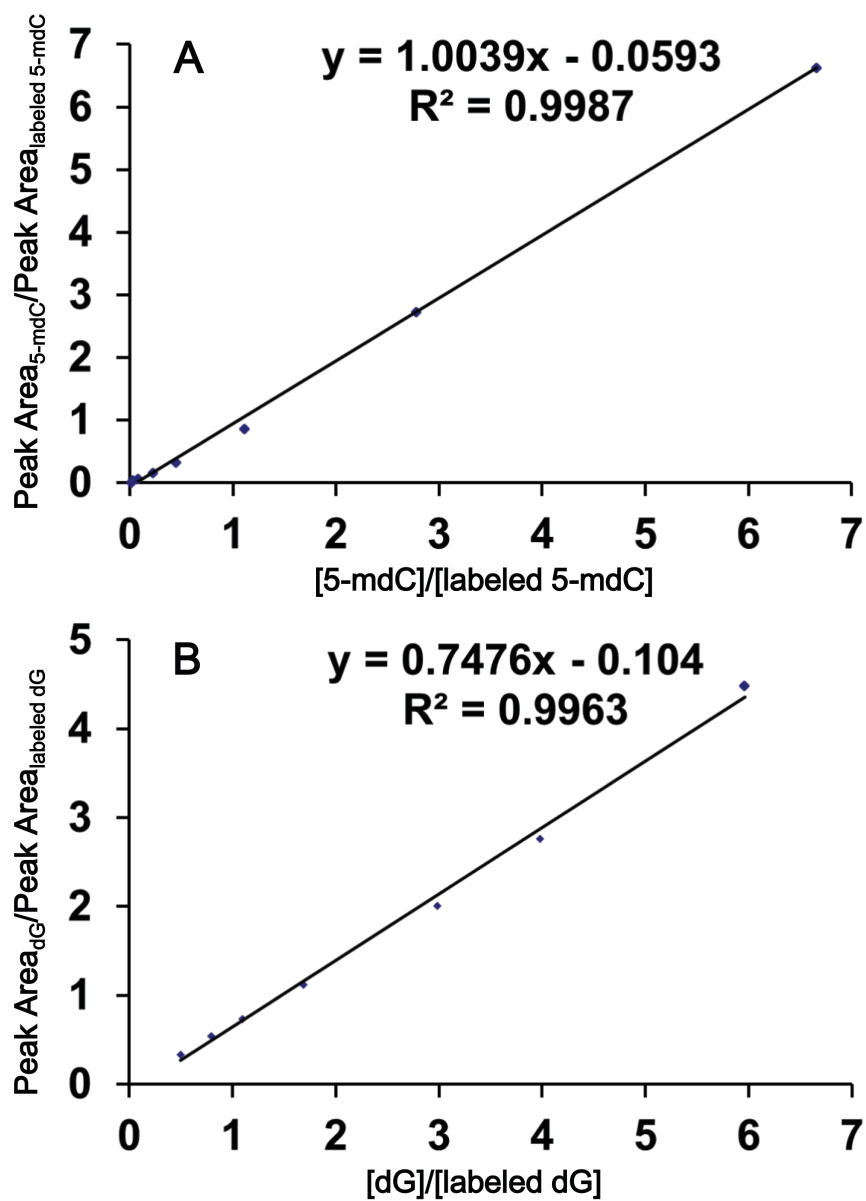

Figure S4.

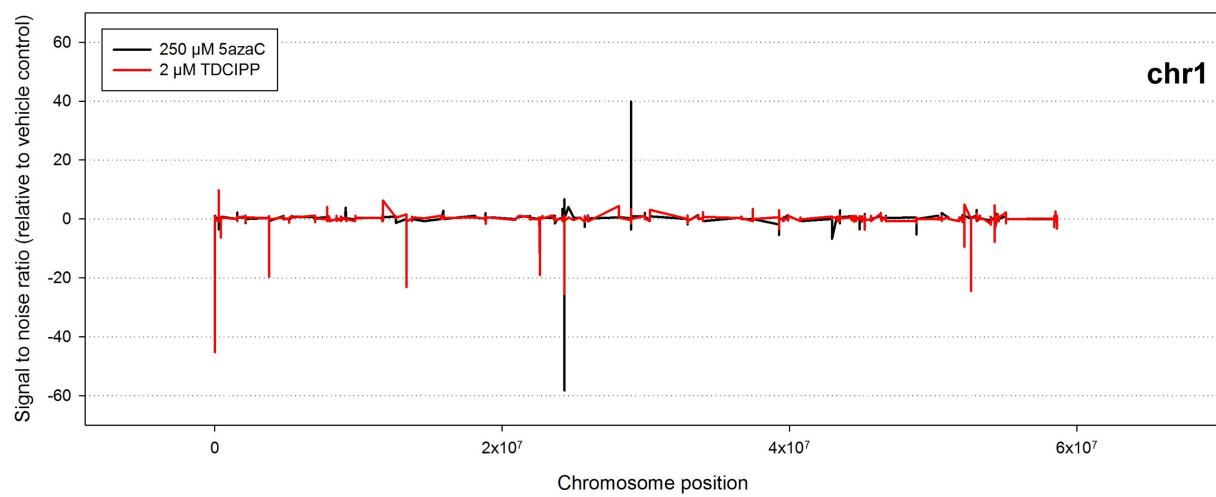

Figure S5.

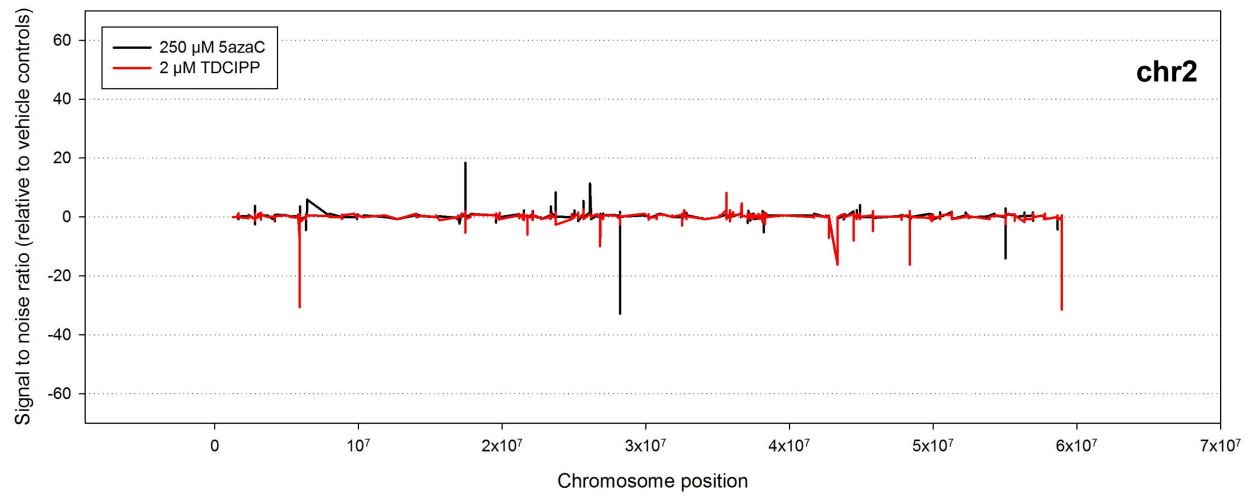



Figure S6.

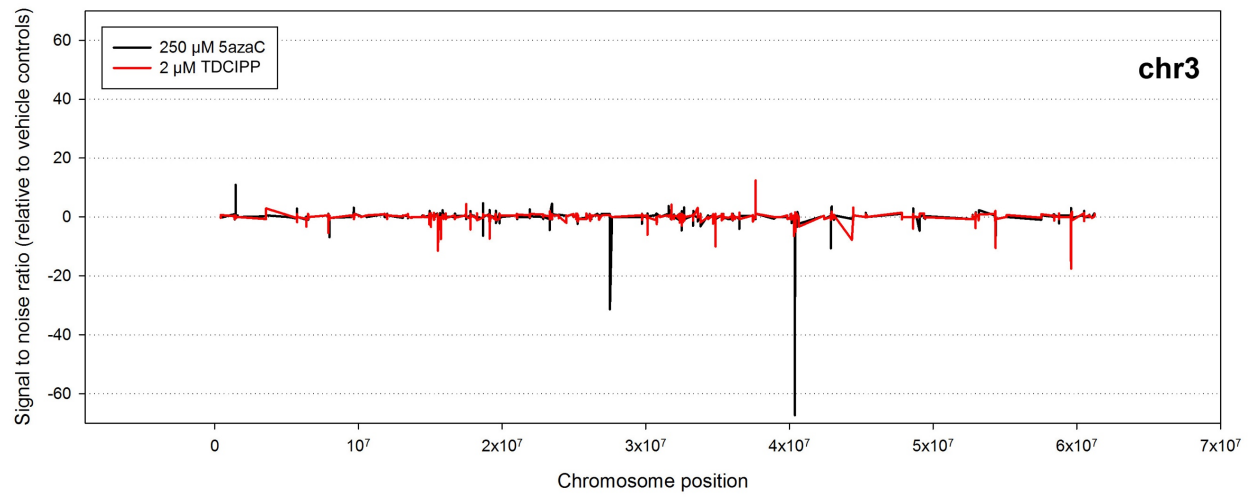

Figure S7.

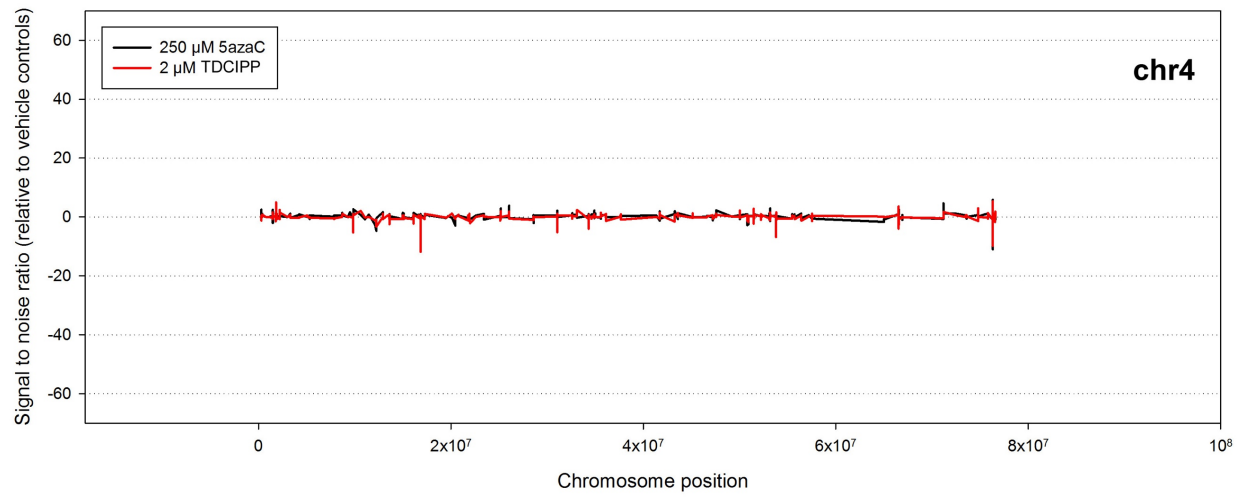

Figure S8.

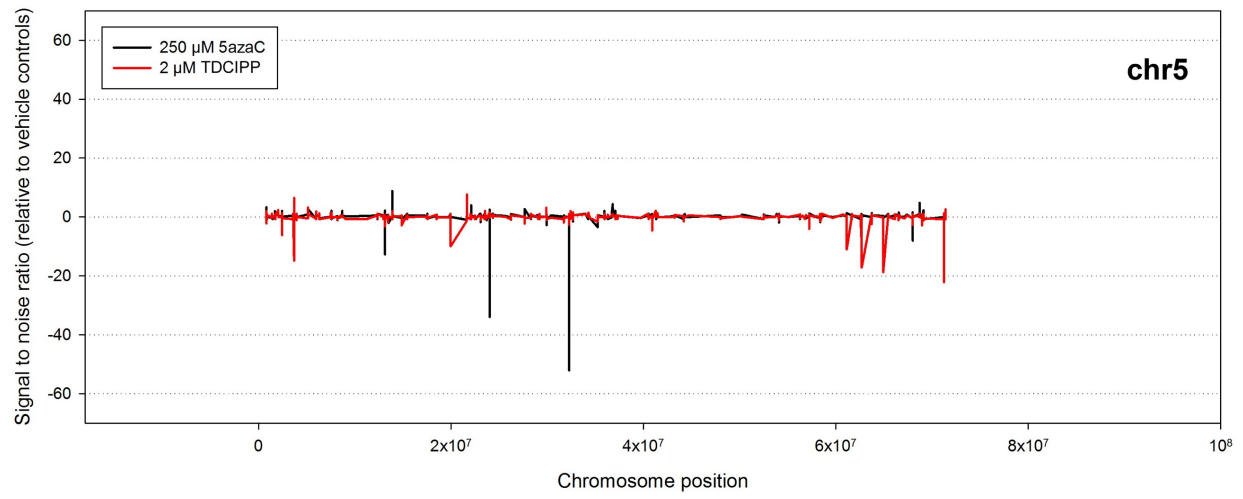

Figure S9.

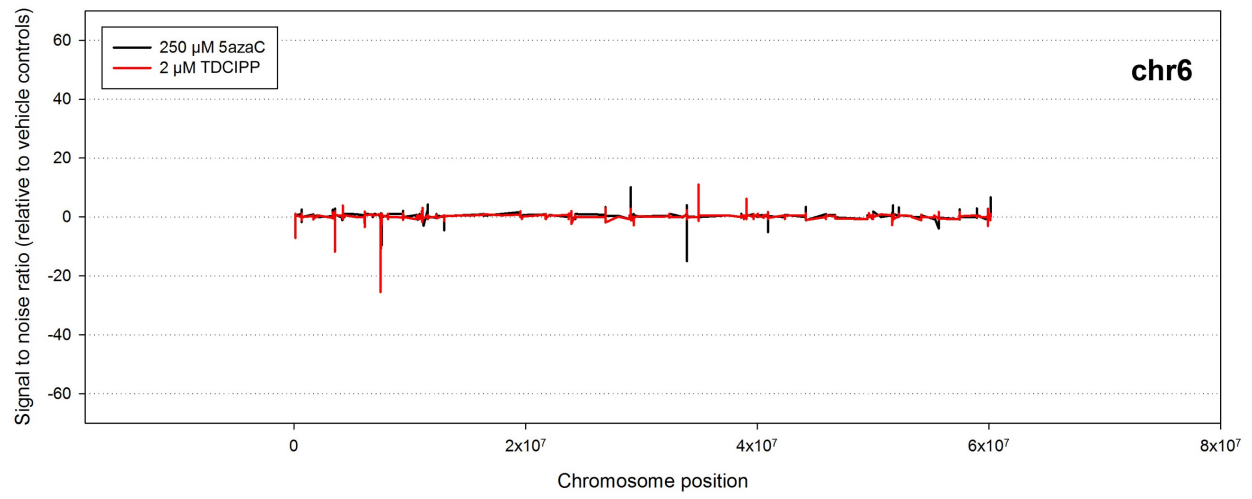

Figure S10.

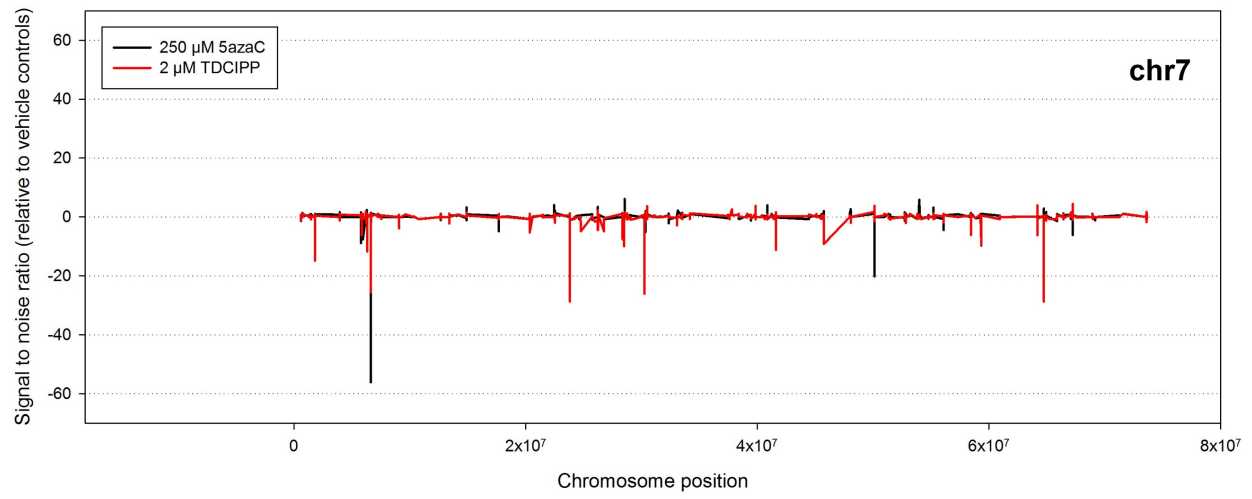

Figure S11.

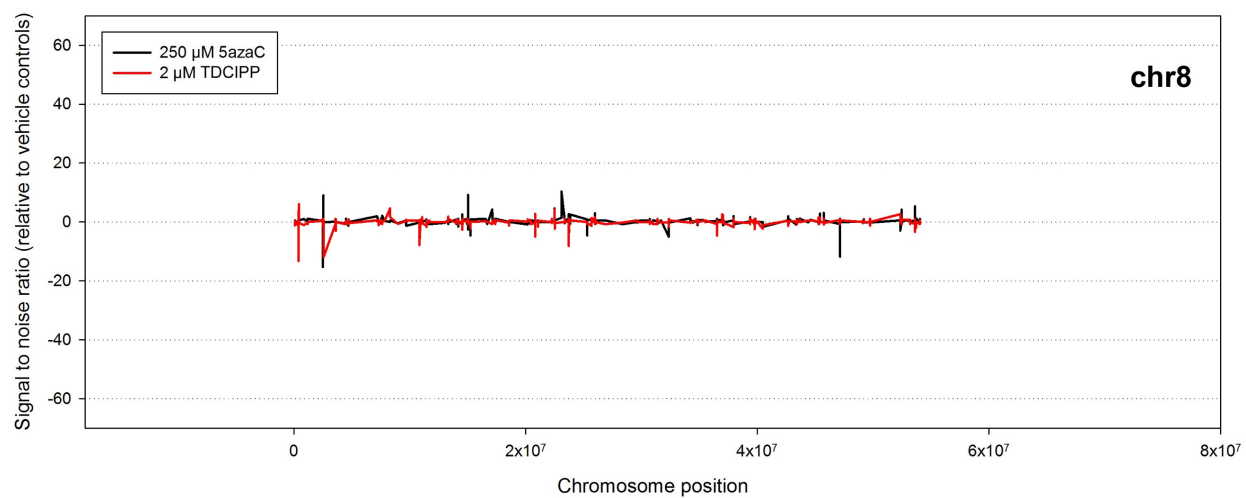

Figure S12.

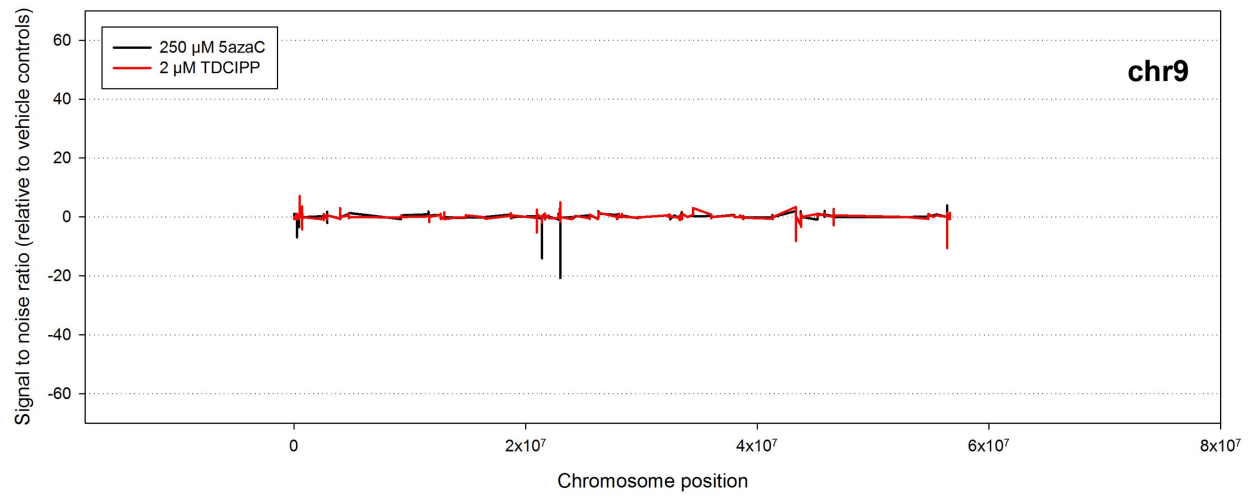

Figure S13.

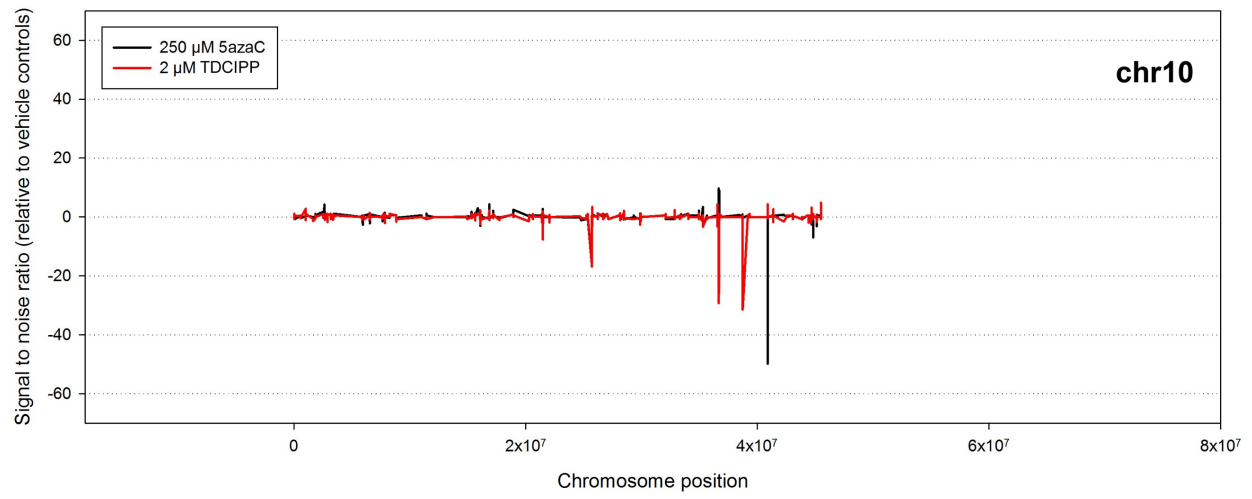



Figure S14.

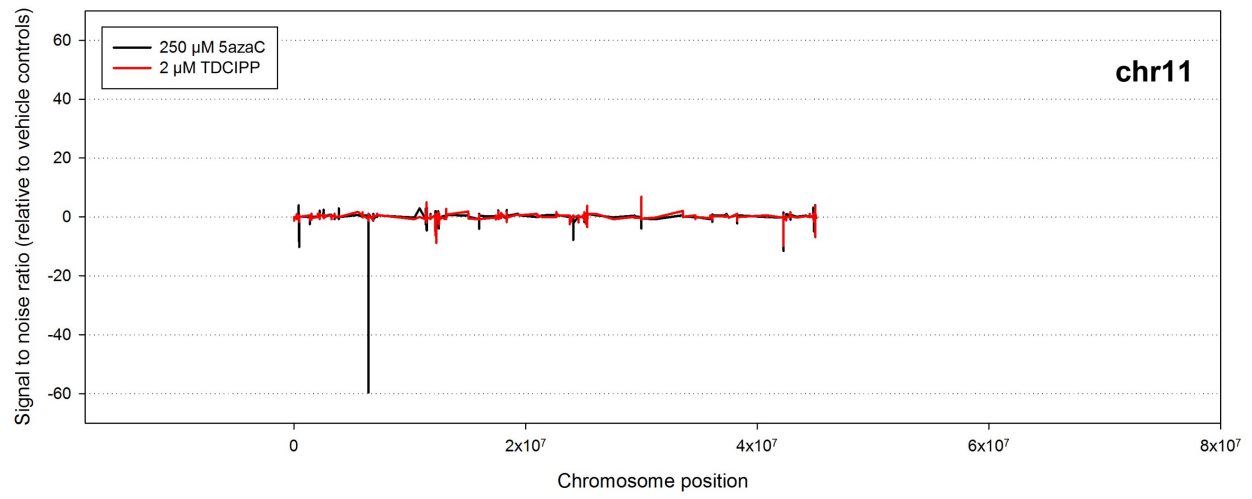

Figure S15.

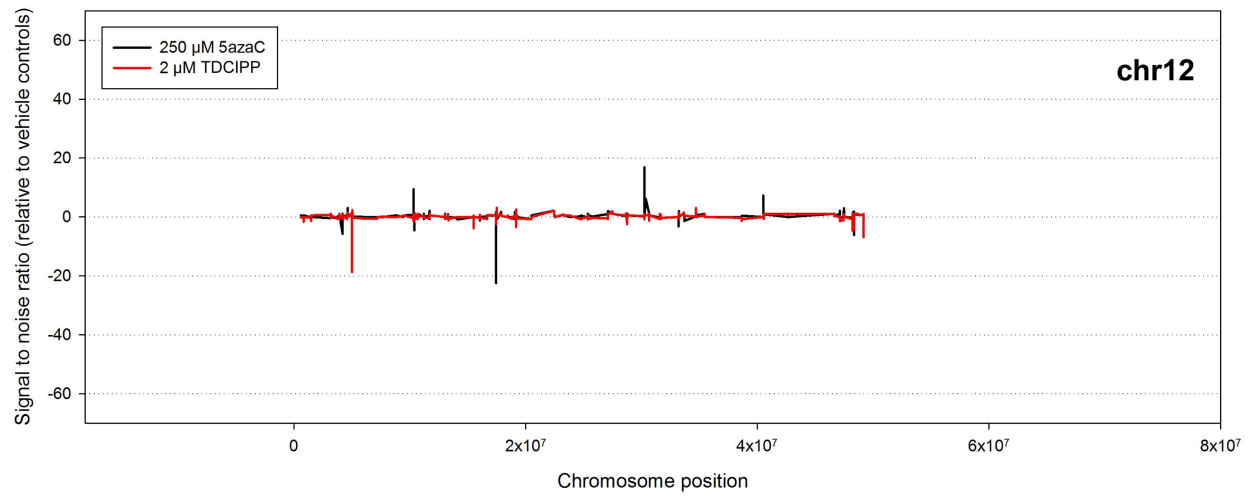

Figure S16.

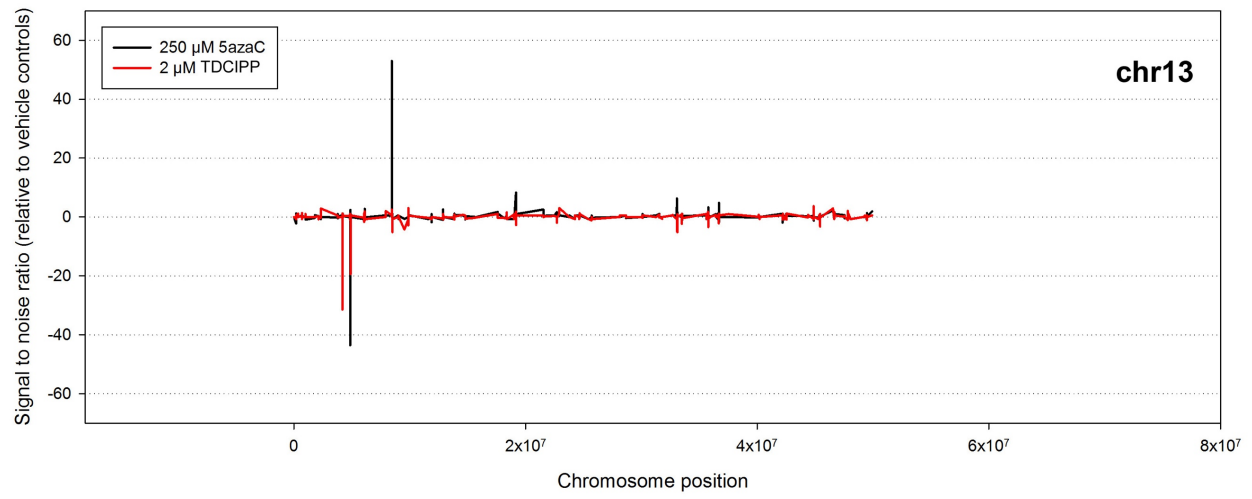

Figure S17.

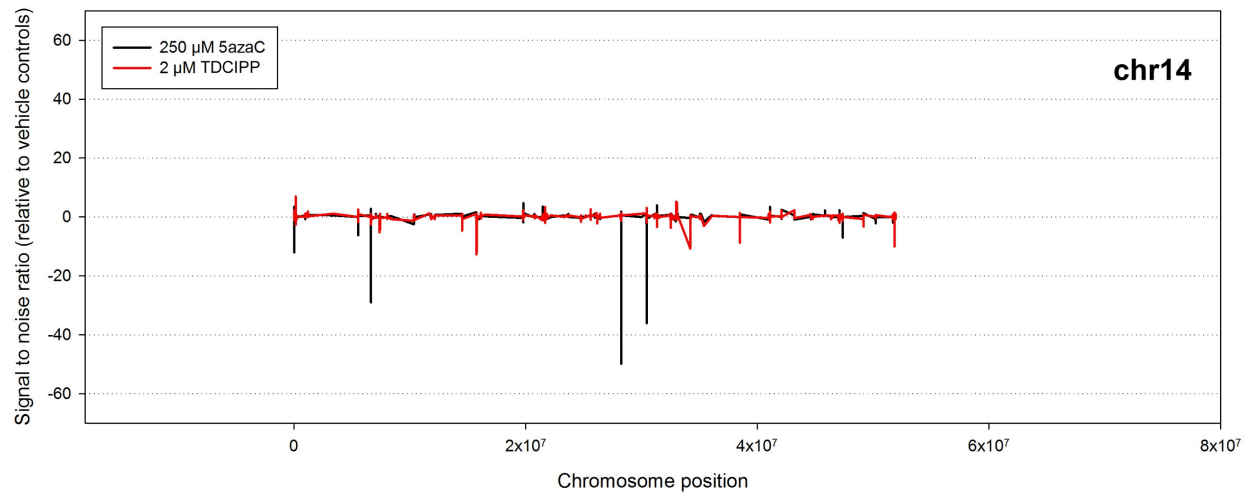

Figure S18.

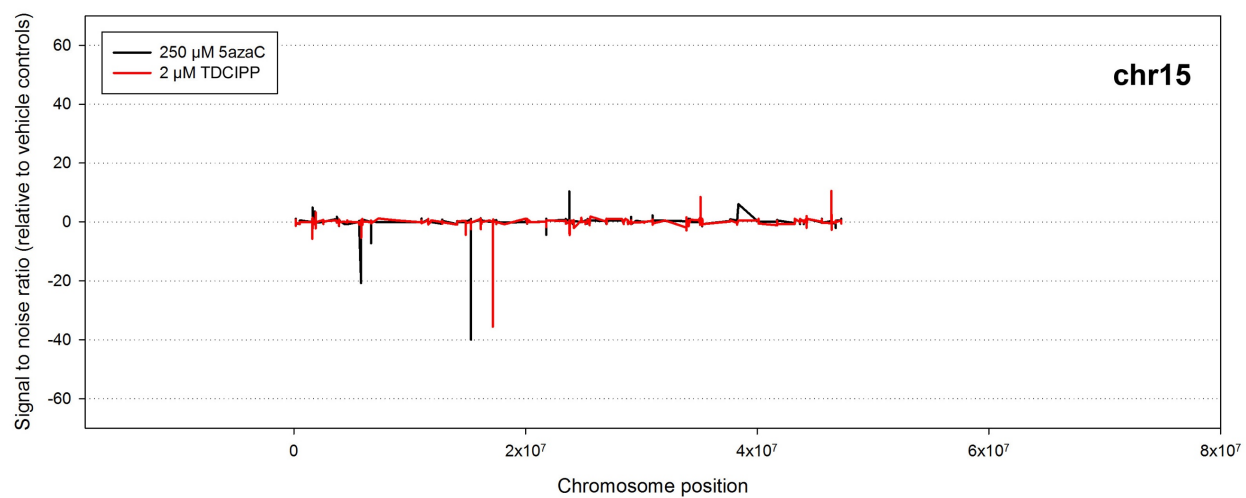

Figure S19.

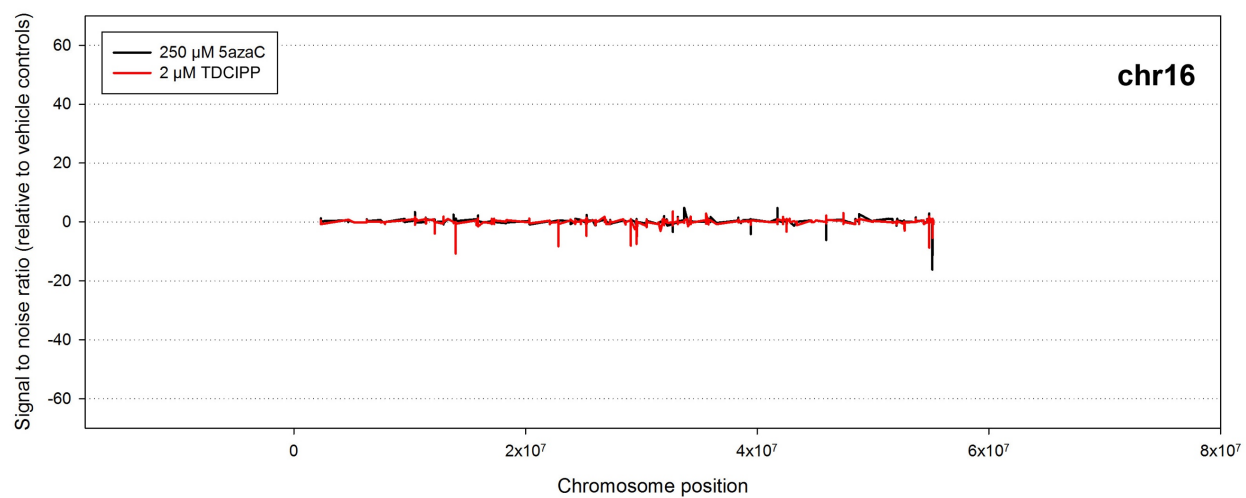

Figure S20.

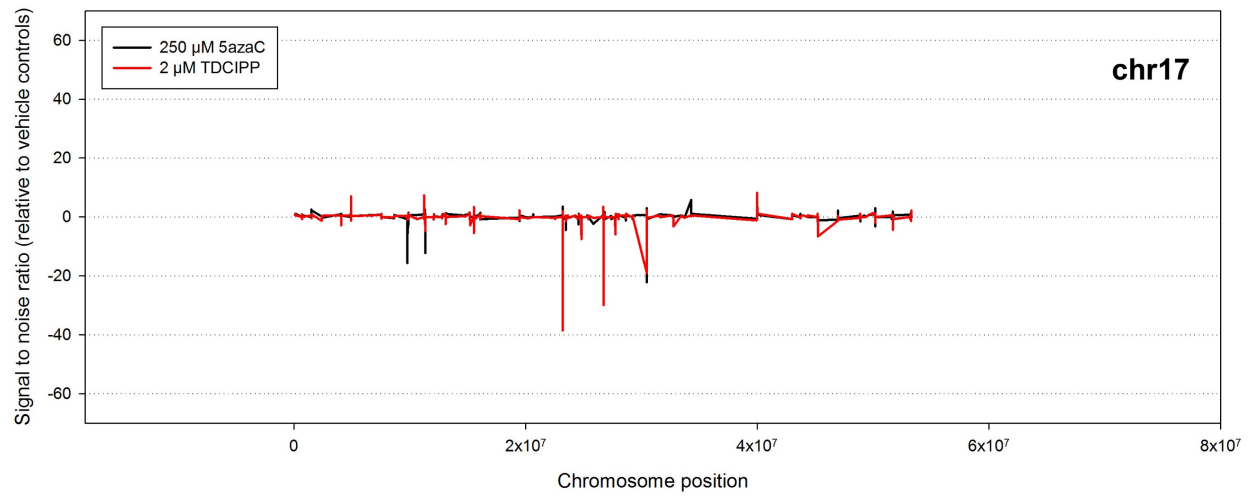

Figure S21.

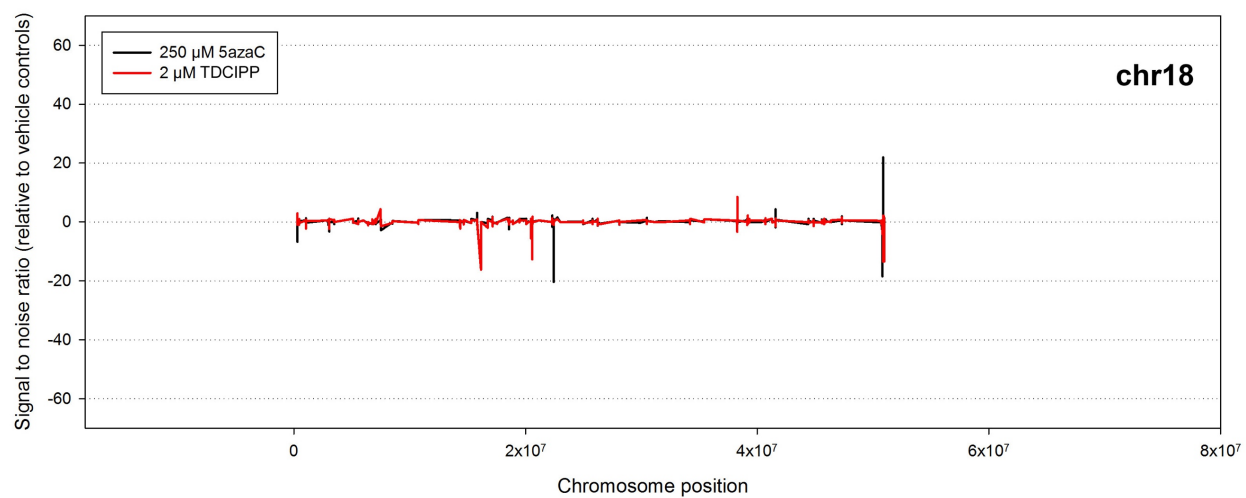



Figure S22.

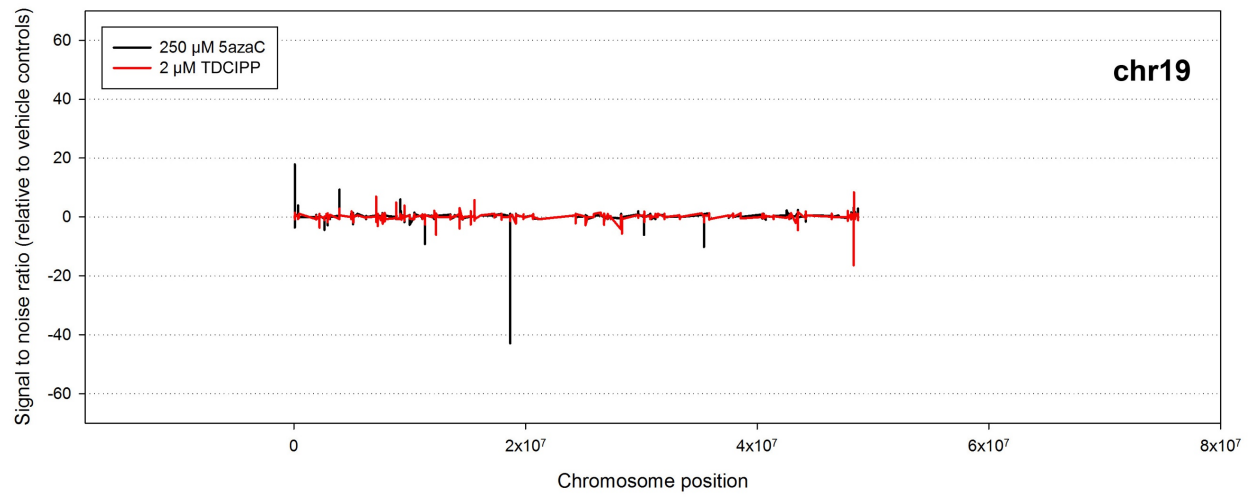

Figure S23.

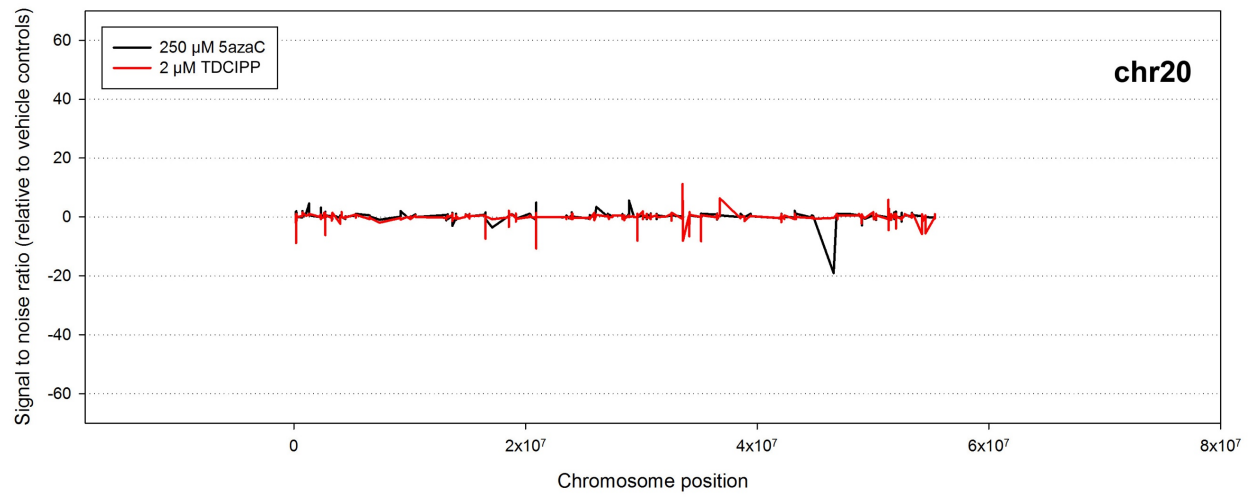

Figure S24.

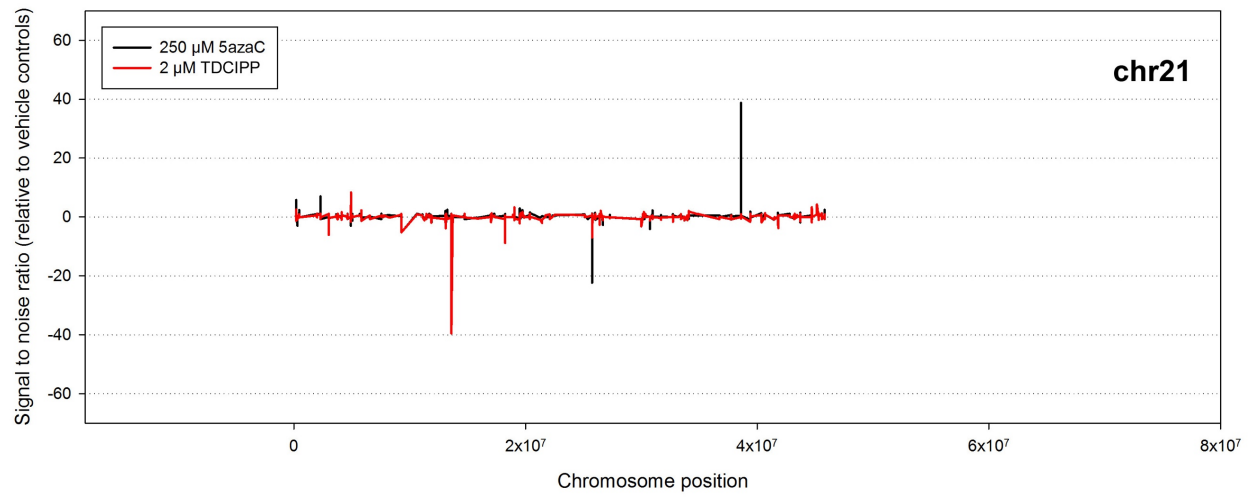

Figure S25.

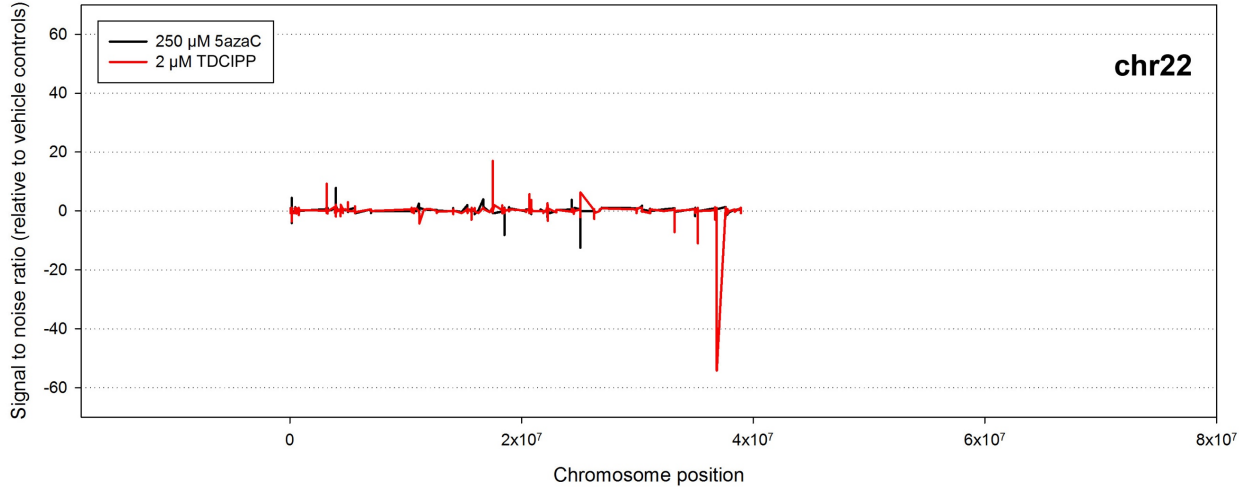

Figure S26.

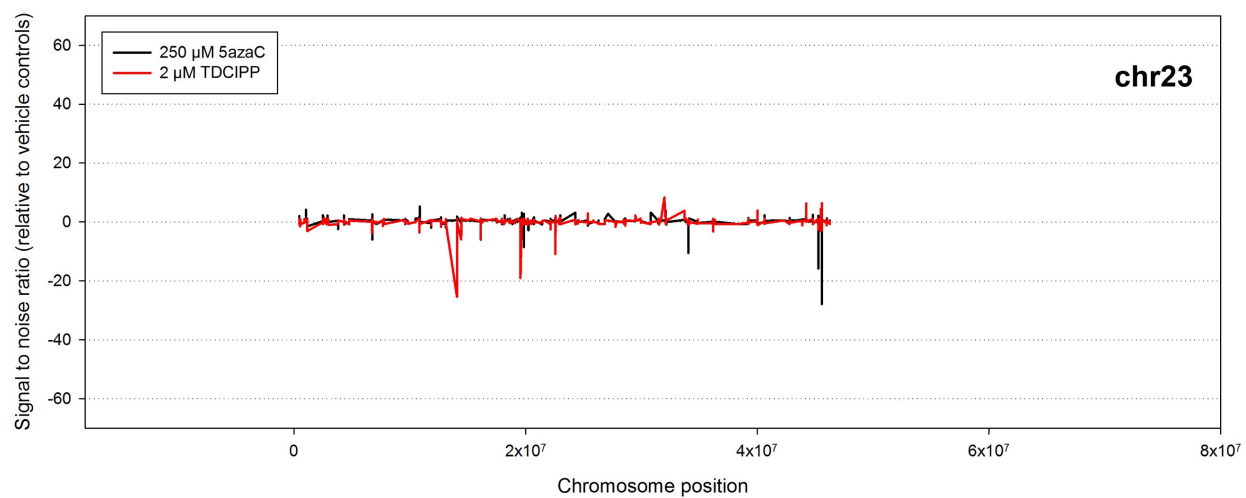

Figure S27.

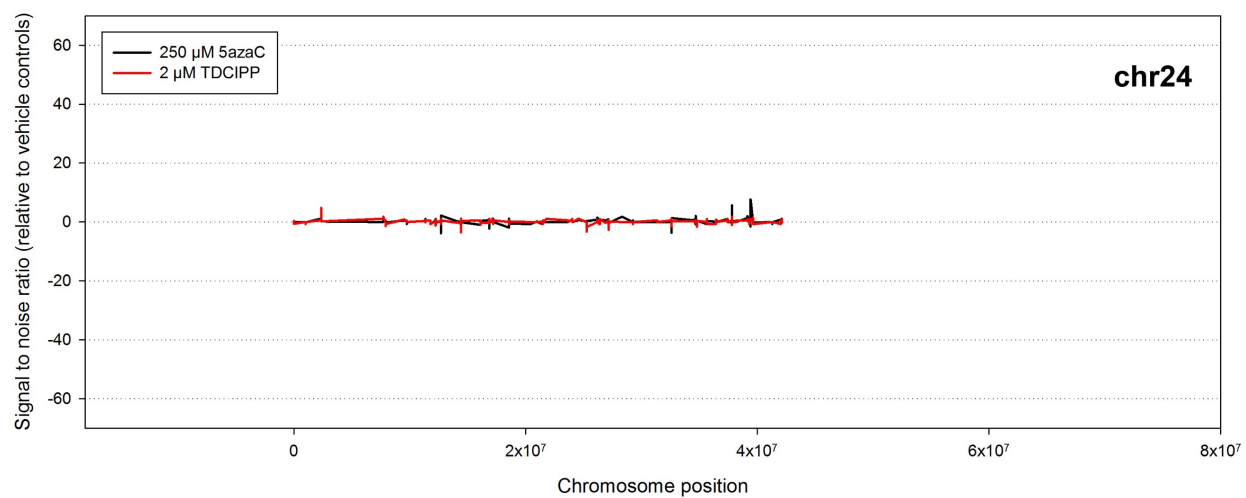

Figure S28.

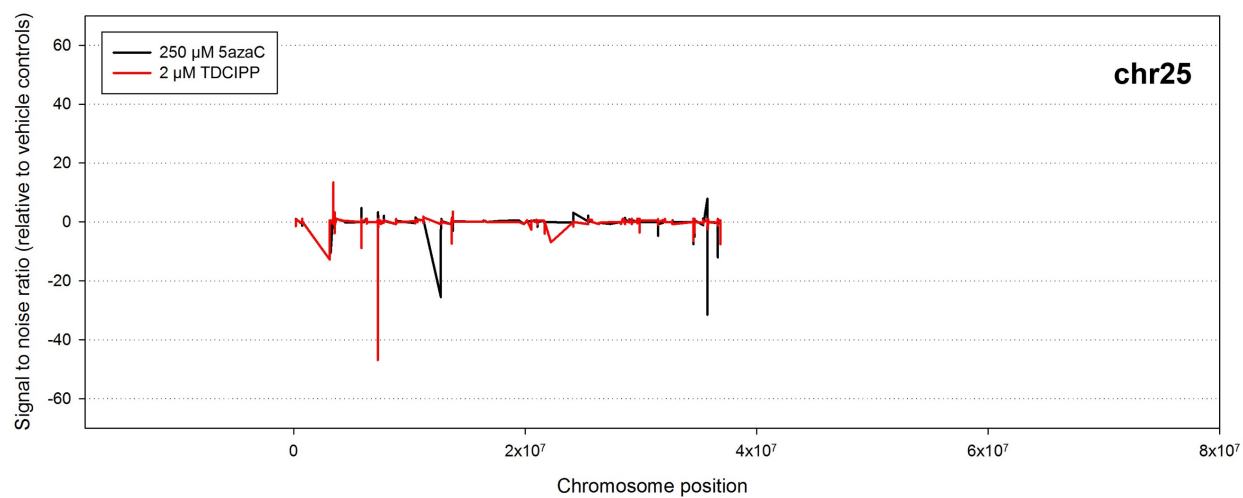

Supplement: es6b03656_si_002.pdf [file es6b03656_si_002.pdf]
